# Supplementary material
Source: publisher figshare collection journal article supplement (https://karger.figshare.com/articles/dataset/_/5122756)
Supplement: Supplementary file 2 [file 1]

Table S1: Oligonucleotide primers used for PCR amplification of *Staphylococcus aureus* fluoroquinolone target genes

| Primer Name | Product (bp) | Tm (°C) | Target gene <sup>a</sup> | Sequence (5'->3')        |
|-------------|--------------|---------|--------------------------|--------------------------|
| oCSSau01F   | 848          | 61      | 5' of <i>gyrB</i>        | CGCGTCAAACGCATTTATTAAG   |
| oCSSau01R   | 848          | 60      | in <i>gyrB</i>           | AATACCGCCCTCATAGTGATAG   |
| oCSSau01F2  | 854          | 55      | 5' of <i>gyrB</i>        | TTGTCACTACGACATCTG       |
| oCSSau01R2  | 854          | 55      | in <i>gyrB</i>           | TGGCTCATCATGAATAGG       |
| oCSSau01F3  | 511          | 62      | START of                 | ATGGTGACTGCATTGTCAGATG   |
| oCSSau01R3  | 511          | 60      | in <i>gyrB</i>           | TCTTATCAGTTGTGCCAACTTC   |
| oCSSau02F   | 586          | 60      | in <i>gyrB</i>           | AAGTTGGCACAACCTGATAAGAC  |
| oCSSau02R   | 586          | 60      | in <i>gyrB</i>           | ACTTGACGCACTTCAGAATTAC   |
| oCSSau02F2  | 829          | 60      | in <i>gyrB</i>           | ACGCATTGTCACAAGACTTAG    |
| oCSSau02R2  | 829          | 61      | in <i>gyrB</i>           | GCTGATTTACGACGTGTTACTTC  |
| oCSSau03F   | 834          | 61      | in <i>gyrB</i>           | TCTGGTGAAGATACACGTGAAG   |
| oCSSau03R   | 834          | 61      | in <i>gyrB</i>           | CTCAGGGTTCATTGTTGTTTCC   |
| oCSSau03F2  | 867          | 62      | in <i>gyrB</i>           | GACGGATTCAAACGTGCATTAAC  |
| oCSSau03R2  | 867          | 62      | in <i>gyrB</i>           | ACCTTTGTATCGTGCAATAGACC  |
| oCSSau04F   | 885          | 61      | in <i>gyrB</i>           | GCCACCGTTGTATAAACTGAC    |
| oCSSau04R   | 885          | 63      | in <i>gyrA</i>           | ATACCTACCGCGATACCTGATG   |
| oCSSau05F   | 748          | 62      | in <i>gyrA</i>           | CAGCAATGCGTTATACTGAAGC   |
| oCSSau05R   | 748          | 62      | in <i>gyrA</i>           | TGCGTACGTCTTCTAACAACCTG  |
| oCSSau05F2  | 875          | 61      | in <i>gyrA</i>           | CAGTTATCGTTATCCGCTTGTTG  |
| oCSSau05R2  | 875          | 61      | in <i>gyrA</i>           | CAAGTGCGATACGTAATCCTTC   |
| oCSSau06F   | 657          | 61      | in <i>gyrA</i>           | TGTGCGTAAGGATGCAAATG     |
| oCSSau06R   | 657          | 60      | in <i>gyrA</i>           | CGATATGTAGATACCGGCAAAC   |
| oCSSau07F   | 632          | 60      | in <i>gyrA</i>           | GATCGTTTTCGGTGATGATCG    |
| oCSSau07R   | 632          | 60      | in <i>gyrA</i>           | GTTGCTGTACGGCCTAAAG      |
| oCSSau07F2  | 889          | 61      | in <i>gyrA</i>           | GCAACAACGCTTCAAACCTTTC   |
| oCSSau07R2  | 889          | 61      | in <i>gyrA</i>           | AGCTACATCAAGCCCTACAAC    |
| oCSSau08F   | 949          | 61      | in <i>gyrA</i>           | GTGGTGTGCTTAAACGTTTCAG   |
| oCSSau08R   | 949          | 60      | 3' of <i>gyrA</i>        | GTGCCACCATCAAGACTTATC    |
| oCSSau08F2  | 1072         | 61      | in <i>gyrA</i>           | GGTATTCTGTAGTGAATGCTATTG |
| oCSSau08R2  | 1072         | 62      | 3' of <i>gyrA</i>        | ATATGTATGTGGTGCCACCATC   |
| oCSSau09F   | 982          | 63      | 5' of <i>parE</i>        | TAGCGCCAGTATTACCACTACC   |
| oCSSau09R   | 982          | 62      | in <i>parE</i>           | TGCTCTTGACGCTCTTTACC     |
| oCSSau09F2  | 821          | 60      | in <i>parE</i>           | TGCAGGACGACCTAATACTC     |
| oCSSau09R2  | 821          | 60      | in <i>parE</i>           | CAGAAGATGGCGAACCAC       |
| oCSSau10F   | 728          | 60      | in <i>parE</i>           | CGCCATCTTCTGGTTTAGTG     |
| oCSSau10R   | 728          | 60      | in <i>parE</i>           | AGCTTTACGTGCAGCTTC       |
| oCSSau10F2  | 788          | 61      | in <i>parE</i>           | GCAGGAGGTAAATTTGGACAAG   |
| oCSSau10R2  | 788          | 60      | in <i>parE</i>           | GGCAATTTGTCTGCAACAAC     |
| oCSSau10F3  | 820          | 62      | in <i>parE</i>           | GTGAATGGCTTGAAGTTGAAATCC |
| oCSSau10R3  | 820          | 62      | in <i>parE</i>           | TTACCTGAACGAGCATCTTCAC   |
| oCSSau11F   | 707          | 61      | in <i>parE</i>           | GCTGTTGTGTCTGTTTCGTATTC  |

|            |     |    |                   |                           |
|------------|-----|----|-------------------|---------------------------|
| oCSSau11R  | 707 | 62 | in <i>parE</i>    | GTCTGTCCAAGCGTATTCAACTC   |
| oCSSau12F  | 683 | 60 | in <i>parE</i>    | AACCGCTTGTTCAAGCAG        |
| oCSSau12R  | 683 | 60 | in <i>parC</i>    | GGACCATTGCTTCGTACAC       |
| oCSSau12F2 | 773 | 62 | in <i>parE</i>    | TGATACTGATGGTGCGCATATTC   |
| oCSSau12R2 | 773 | 62 | in <i>parC</i>    | ACATGTCGTAACCTCCAGTCTTG   |
| oCSSau13F  | 841 | 62 | in <i>parE</i>    | TTGGTATGCAAGAGGACCAAAG    |
| oCSSau13R  | 841 | 61 | in <i>parC</i>    | ACGTCCATTGCGTAAAGTTTC     |
| oCSSau14F  | 791 | 63 | in <i>parC</i>    | TACGCGACAGATATAACCACCAC   |
| oCSSau14R  | 791 | 63 | in <i>parC</i>    | CCTTCAAGCGCAACTATGTCAG    |
| oCSSau15F  | 801 | 61 | in <i>parC</i>    | ACAGGCTGAAGCAATTGTAATG    |
| oCSSau15R  | 801 | 62 | in <i>parC</i>    | TTAACACCAGCTGCCCTTAATC    |
| oCSSau15F2 | 949 | 60 | in <i>parC</i>    | ACAAGCGTGACGCTAAAG        |
| oCSSau15R2 | 949 | 63 | in <i>parC</i>    | TTTAACGAGCCGCGTTGTG       |
| oCSSau16F  | 891 | 60 | in <i>parC</i>    | AGAATTGGGACAACATGTATCAC   |
| oCSSau16R  | 891 | 60 | 3' of <i>parC</i> | ATTAGACCGAATTGAACCTTCAG   |
| oCSSau16F2 | 768 | 61 | in <i>parC</i>    | GATTTGATTAGTGTTATGCGCTTTG |
| oCSSau16R2 | 768 | 60 | 3' of <i>parC</i> | AAACCATCCAGGTATTAACTATCG  |

<sup>a</sup>The sequence used for primer design was the published complete genome of *S. aureus* strain Newman (GenBank accession no. NC 009641)

Table S2a: Summary of all DNA gyrase amino acid variations among fluoroquinolone-susceptible *S. aureus* and MIC values for ATCC 29213 and 13 ocular isolates assigned to Group 1

|                 | GyrA |      |      |     |     |     |     |     |     |     |     |     |     |     |     |     |     | GyrB |     |     |     |     |     | GenBank accession no. |     |    |    |     |     |     |           |  |
|-----------------|------|------|------|-----|-----|-----|-----|-----|-----|-----|-----|-----|-----|-----|-----|-----|-----|------|-----|-----|-----|-----|-----|-----------------------|-----|----|----|-----|-----|-----|-----------|--|
|                 | 84 # | 85 # | 88 # | 248 | 255 | 275 | 325 | 402 | 457 | 483 | 495 | 594 | 598 | 668 | 712 | 815 | 818 | 826  | 827 | 837 | 856 | 859 | 860 |                       | 886 | 28 | 66 | 169 | 317 | 491 | 568       |  |
| GenBank strains |      |      |      |     |     |     |     |     |     |     |     |     |     |     |     |     |     |      |     |     |     |     |     |                       |     |    |    |     |     |     |           |  |
| Newman          | S    | S    | E    | V   | G   | E   | T   | D   | A   | D   | N   | E   | V   | S   | V   | E   | T   | S    | T   | R   | D   | E   | N   | E                     | V   | Q  | D  | E   | G   | E   | NC_009641 |  |
| N315            | S    | S    | E    | V   | G   | E   | T   | D   | T   | D   | D   | E   | V   | S   | V   | E   | T   | S    | T   | R   | D   | E   | N   | E                     | V   | K  | D  | E   | G   | E   | NC_002745 |  |
| NCTC8325        | S    | S    | E    | V   | G   | E   | T   | D   | A   | D   | D   | E   | V   | S   | V   | E   | T   | S    | T   | R   | D   | E   | N   | E                     | V   | Q  | D  | E   | G   | E   | NC_007795 |  |
| RF122           | S    | S    | E    | V   | R   | E   | T   | D   | A   | E   | D   | E   | V   | S   | V   | --  | V   | --   | --  | R   | D   | E   | N   | E                     | V   | Q  | D  | E   | D   | K   | NC_007622 |  |
| MSSA476         | S    | S    | E    | V   | G   | E   | T   | D   | A   | D   | D   | E   | V   | S   | V   | E   | T   | S    | T   | R   | D   | E   | N   | E                     | V   | Q  | D  | E   | G   | E   | NC_002953 |  |
| COL             | S    | S    | E    | V   | G   | E   | T   | D   | A   | D   | N   | E   | V   | S   | V   | E   | T   | S    | T   | R   | D   | E   | N   | E                     | A   | Q  | D  | E   | G   | E   | NC_002951 |  |
| MW2             | S    | S    | E    | V   | G   | E   | T   | D   | A   | D   | D   | E   | V   | S   | V   | E   | T   | S    | T   | R   | D   | E   | N   | E                     | V   | Q  | D  | E   | G   | E   | NC_003923 |  |
|                 |      |      |      |     |     |     |     |     |     |     |     |     |     |     |     |     |     |      |     |     |     |     |     |                       |     |    |    |     |     |     |           |  |
|                 |      |      |      |     |     |     |     |     |     |     |     |     |     |     |     |     |     |      |     |     |     |     |     |                       |     |    |    |     |     |     |           |  |
|                 |      |      |      |     |     |     |     |     |     |     |     |     |     |     |     |     |     |      |     |     |     |     |     |                       |     |    |    |     |     |     |           |  |
|                 |      |      |      |     |     |     |     |     |     |     |     |     |     |     |     |     |     |      |     |     |     |     |     |                       |     |    |    |     |     |     |           |  |
|                 |      |      |      |     |     |     |     |     |     |     |     |     |     |     |     |     |     |      |     |     |     |     |     |                       |     |    |    |     |     |     |           |  |
|                 |      |      |      |     |     |     |     |     |     |     |     |     |     |     |     |     |     |      |     |     |     |     |     |                       |     |    |    |     |     |     |           |  |
|                 |      |      |      |     |     |     |     |     |     |     |     |     |     |     |     |     |     |      |     |     |     |     |     |                       |     |    |    |     |     |     |           |  |
|                 |      |      |      |     |     |     |     |     |     |     |     |     |     |     |     |     |     |      |     |     |     |     |     |                       |     |    |    |     |     |     |           |  |
|                 |      |      |      |     |     |     |     |     |     |     |     |     |     |     |     |     |     |      |     |     |     |     |     |                       |     |    |    |     |     |     |           |  |
|                 |      |      |      |     |     |     |     |     |     |     |     |     |     |     |     |     |     |      |     |     |     |     |     |                       |     |    |    |     |     |     |           |  |
|                 |      |      |      |     |     |     |     |     |     |     |     |     |     |     |     |     |     |      |     |     |     |     |     |                       |     |    |    |     |     |     |           |  |
|                 |      |      |      |     |     |     |     |     |     |     |     |     |     |     |     |     |     |      |     |     |     |     |     |                       |     |    |    |     |     |     |           |  |
|                 |      |      |      |     |     |     |     |     |     |     |     |     |     |     |     |     |     |      |     |     |     |     |     |                       |     |    |    |     |     |     |           |  |
|                 |      |      |      |     |     |     |     |     |     |     |     |     |     |     |     |     |     |      |     |     |     |     |     |                       |     |    |    |     |     |     |           |  |
|                 |      |      |      |     |     |     |     |     |     |     |     |     |     |     |     |     |     |      |     |     |     |     |     |                       |     |    |    |     |     |     |           |  |
|                 |      |      |      |     |     |     |     |     |     |     |     |     |     |     |     |     |     |      |     |     |     |     |     |                       |     |    |    |     |     |     |           |  |
|                 |      |      |      |     |     |     |     |     |     |     |     |     |     |     |     |     |     |      |     |     |     |     |     |                       |     |    |    |     |     |     |           |  |
|                 |      |      |      |     |     |     |     |     |     |     |     |     |     |     |     |     |     |      |     |     |     |     |     |                       |     |    |    |     |     |     |           |  |
|                 |      |      |      |     |     |     |     |     |     |     |     |     |     |     |     |     |     |      |     |     |     |     |     |                       |     |    |    |     |     |     |           |  |
|                 |      |      |      |     |     |     |     |     |     |     |     |     |     |     |     |     |     |      |     |     |     |     |     |                       |     |    |    |     |     |     |           |  |
|                 |      |      |      |     |     |     |     |     |     |     |     |     |     |     |     |     |     |      |     |     |     |     |     |                       |     |    |    |     |     |     |           |  |
|                 |      |      |      |     |     |     |     |     |     |     |     |     |     |     |     |     |     |      |     |     |     |     |     |                       |     |    |    |     |     |     |           |  |
|                 |      |      |      |     |     |     |     |     |     |     |     |     |     |     |     |     |     |      |     |     |     |     |     |                       |     |    |    |     |     |     |           |  |
|                 |      |      |      |     |     |     |     |     |     |     |     |     |     |     |     |     |     |      |     |     |     |     |     |                       |     |    |    |     |     |     |           |  |
|                 |      |      |      |     |     |     |     |     |     |     |     |     |     |     |     |     |     |      |     |     |     |     |     |                       |     |    |    |     |     |     |           |  |
|                 |      |      |      |     |     |     |     |     |     |     |     |     |     |     |     |     |     |      |     |     |     |     |     |                       |     |    |    |     |     |     |           |  |
|                 |      |      |      |     |     |     |     |     |     |     |     |     |     |     |     |     |     |      |     |     |     |     |     |                       |     |    |    |     |     |     |           |  |
|                 |      |      |      |     |     |     |     |     |     |     |     |     |     |     |     |     |     |      |     |     |     |     |     |                       |     |    |    |     |     |     |           |  |
|                 |      |      |      |     |     |     |     |     |     |     |     |     |     |     |     |     |     |      |     |     |     |     |     |                       |     |    |    |     |     |     |           |  |
|                 |      |      |      |     |     |     |     |     |     |     |     |     |     |     |     |     |     |      |     |     |     |     |     |                       |     |    |    |     |     |     |           |  |
|                 |      |      |      |     |     |     |     |     |     |     |     |     |     |     |     |     |     |      |     |     |     |     |     |                       |     |    |    |     |     |     |           |  |
|                 |      |      |      |     |     |     |     |     |     |     |     |     |     |     |     |     |     |      |     |     |     |     |     |                       |     |    |    |     |     |     |           |  |
|                 |      |      |      |     |     |     |     |     |     |     |     |     |     |     |     |     |     |      |     |     |     |     |     |                       |     |    |    |     |     |     |           |  |
|                 |      |      |      |     |     |     |     |     |     |     |     |     |     |     |     |     |     |      |     |     |     |     |     |                       |     |    |    |     |     |     |           |  |
|                 |      |      |      |     |     |     |     |     |     |     |     |     |     |     |     |     |     |      |     |     |     |     |     |                       |     |    |    |     |     |     |           |  |
|                 |      |      |      |     |     |     |     |     |     |     |     |     |     |     |     |     |     |      |     |     |     |     |     |                       |     |    |    |     |     |     |           |  |
|                 |      |      |      |     |     |     |     |     |     |     |     |     |     |     |     |     |     |      |     |     |     |     |     |                       |     |    |    |     |     |     |           |  |
|                 |      |      |      |     |     |     |     |     |     |     |     |     |     |     |     |     |     |      |     |     |     |     |     |                       |     |    |    |     |     |     |           |  |
|                 |      |      |      |     |     |     |     |     |     |     |     |     |     |     |     |     |     |      |     |     |     |     |     |                       |     |    |    |     |     |     |           |  |
|                 |      |      |      |     |     |     |     |     |     |     |     |     |     |     |     |     |     |      |     |     |     |     |     |                       |     |    |    |     |     |     |           |  |
|                 |      |      |      |     |     |     |     |     |     |     |     |     |     |     |     |     |     |      |     |     |     |     |     |                       |     |    |    |     |     |     |           |  |
|                 |      |      |      |     |     |     |     |     |     |     |     |     |     |     |     |     |     |      |     |     |     |     |     |                       |     |    |    |     |     |     |           |  |
|                 |      |      |      |     |     |     |     |     |     |     |     |     |     |     |     |     |     |      |     |     |     |     |     |                       |     |    |    |     |     |     |           |  |
|                 |      |      |      |     |     |     |     |     |     |     |     |     |     |     |     |     |     |      |     |     |     |     |     |                       |     |    |    |     |     |     |           |  |
|                 |      |      |      |     |     |     |     |     |     |     |     |     |     |     |     |     |     |      |     |     |     |     |     |                       |     |    |    |     |     |     |           |  |
|                 |      |      |      |     |     |     |     |     |     |     |     |     |     |     |     |     |     |      |     |     |     |     |     |                       |     |    |    |     |     |     |           |  |
|                 |      |      |      |     |     |     |     |     |     |     |     |     |     |     |     |     |     |      |     |     |     |     |     |                       |     |    |    |     |     |     |           |  |
|                 |      |      |      |     |     |     |     |     |     |     |     |     |     |     |     |     |     |      |     |     |     |     |     |                       |     |    |    |     |     |     |           |  |
|                 |      |      |      |     |     |     |     |     |     |     |     |     |     |     |     |     |     |      |     |     |     |     |     |                       |     |    |    |     |     |     |           |  |
|                 |      |      |      |     |     |     |     |     |     |     |     |     |     |     |     |     |     |      |     |     |     |     |     |                       |     |    |    |     |     |     |           |  |
|                 |      |      |      |     |     |     |     |     |     |     |     |     |     |     |     |     |     |      |     |     |     |     |     |                       |     |    |    |     |     |     |           |  |
|                 |      |      |      |     |     |     |     |     |     |     |     |     |     |     |     |     |     |      |     |     |     |     |     |                       |     |    |    |     |     |     |           |  |
|                 |      |      |      |     |     |     |     |     |     |     |     |     |     |     |     |     |     |      |     |     |     |     |     |                       |     |    |    |     |     |     |           |  |
|                 |      |      |      |     |     |     |     |     |     |     |     |     |     |     |     |     |     |      |     |     |     |     |     |                       |     |    |    |     |     |     |           |  |
|                 |      |      |      |     |     |     |     |     |     |     |     |     |     |     |     |     |     |      |     |     |     |     |     |                       |     |    |    |     |     |     |           |  |
|                 |      |      |      |     |     |     |     |     |     |     |     |     |     |     |     |     |     |      |     |     |     |     |     |                       |     |    |    |     |     |     |           |  |
|                 |      |      |      |     |     |     |     |     |     |     |     |     |     |     |     |     |     |      |     |     |     |     |     |                       |     |    |    |     |     |     |           |  |
|                 |      |      |      |     |     |     |     |     |     |     |     |     |     |     |     |     |     |      |     |     |     |     |     |                       |     |    |    |     |     |     |           |  |
|                 |      |      |      |     |     |     |     |     |     |     |     |     |     |     |     |     |     |      |     |     |     |     |     |                       |     |    |    |     |     |     |           |  |
|                 |      |      |      |     |     |     |     |     |     |     |     |     |     |     |     |     |     |      |     |     |     |     |     |                       |     |    |    |     |     |     |           |  |
|                 |      |      |      |     |     |     |     |     |     |     |     |     |     |     |     |     |     |      |     |     |     |     |     |                       |     |    |    |     |     |     |           |  |
|                 |      |      |      |     |     |     |     |     |     |     |     |     |     |     |     |     |     |      |     |     |     |     |     |                       |     |    |    |     |     |     |           |  |
|                 |      |      |      |     |     |     |     |     |     |     |     |     |     |     |     |     |     |      |     |     |     |     |     |                       |     |    |    |     |     |     |           |  |
|                 |      |      |      |     |     |     |     |     |     |     |     |     |     |     |     |     |     |      |     |     |     |     |     |                       |     |    |    |     |     |     |           |  |
|                 |      |      |      |     |     |     |     |     |     |     |     |     |     |     |     |     |     |      |     |     |     |     |     |                       |     |    |    |     |     |     |           |  |
|                 |      |      |      |     |     |     |     |     |     |     |     |     |     |     |     |     |     |      |     |     |     |     |     |                       |     |    |    |     |     |     |           |  |
|                 |      |      |      |     |     |     |     |     |     |     |     |     |     |     |     |     |     |      |     |     |     |     |     |                       |     |    |    |     |     |     |           |  |
|                 |      |      |      |     |     |     |     |     |     |     |     |     |     |     |     |     |     |      |     |     |     |     |     |                       |     |    |    |     |     |     |           |  |
|                 |      |      |      |     |     |     |     |     |     |     |     |     |     |     |     |     |     |      |     |     |     |     |     |                       |     |    |    |     |     |     |           |  |
|                 |      |      |      |     |     |     |     |     |     |     |     |     |     |     |     |     |     |      |     |     |     |     |     |                       |     |    |    |     |     |     |           |  |
|                 |      |      |      |     |     |     |     |     |     |     |     |     |     |     |     |     |     |      |     |     |     |     |     |                       |     |    |    |     |     |     |           |  |
|                 |      |      |      |     |     |     |     |     |     |     |     |     |     |     |     |     |     |      |     |     |     |     |     |                       |     |    |    |     |     |     |           |  |
|                 |      |      |      |     |     |     |     |     |     |     |     |     |     |     |     |     |     |      |     |     |     |     |     |                       |     |    |    |     |     |     |           |  |
|                 |      |      |      |     |     |     |     |     |     |     |     |     |     |     |     |     |     |      |     |     |     |     |     |                       |     |    |    |     |     |     |           |  |
|                 |      |      |      |     |     |     |     |     |     |     |     |     |     |     |     |     |     |      |     |     |     |     |     |                       |     |    |    |     |     |     |           |  |
|                 |      |      |      |     |     |     |     |     |     |     |     |     |     |     |     |     |     |      |     |     |     |     |     |                       |     |    |    |     |     |     |           |  |
|                 |      |      |      |     |     |     |     |     |     |     |     |     |     |     |     |     |     |      |     |     |     |     |     |                       |     |    |    |     |     |     |           |  |
|                 |      |      |      |     |     |     |     |     |     |     |     |     |     |     |     |     |     |      |     |     |     |     |     |                       |     |    |    |     |     |     |           |  |
|                 |      |      |      |     |     |     |     |     |     |     |     |     |     |     |     |     |     |      |     |     |     |     |     |                       |     |    |    |     |     |     |           |  |
|                 |      |      |      |     |     |     |     |     |     |     |     |     |     |     |     |     |     |      |     |     |     |     |     |                       |     |    |    |     |     |     |           |  |
|                 |      |      |      |     |     |     |     |     |     |     |     |     |     |     |     |     |     |      |     |     |     |     |     |                       |     |    |    |     |     |     |           |  |
|                 |      |      |      |     |     |     |     |     |     |     |     |     |     |     |     |     |     |      |     |     |     |     |     |                       |     |    |    |     |     |     |           |  |
|                 |      |      |      |     |     |     |     |     |     |     |     |     |     |     |     |     |     |      |     |     |     |     |     |                       |     |    |    |     |     |     |           |  |
|                 |      |      |      |     |     |     |     |     |     |     |     |     |     |     |     |     |     |      |     |     |     |     |     |                       |     |    |    |     |     |     |           |  |
|                 |      |      |      |     |     |     |     |     |     |     |     |     |     |     |     |     |     |      |     |     |     |     |     |                       |     |    |    |     |     |     |           |  |
|                 |      |      |      |     |     |     |     |     |     |     |     |     |     |     |     |     |     |      |     |     |     |     |     |                       |     |    |    |     |     |     |           |  |
|                 |      |      |      |     |     |     |     |     |     |     |     |     |     |     |     |     |     |      |     |     |     |     |     |                       |     |    |    |     |     |     |           |  |
|                 |      |      |      |     |     |     |     |     |     |     |     |     |     |     |     |     |     |      |     |     |     |     |     |                       |     |    |    |     |     |     |           |  |
|                 |      |      |      |     |     |     |     |     |     |     |     |     |     |     |     |     |     |      |     |     |     |     |     |                       |     |    |    |     |     |     |           |  |
|                 |      |      |      |     |     |     |     |     |     |     |     |     |     |     |     |     |     |      |     |     |     |     |     |                       |     |    |    |     |     |     |           |  |
|                 |      |      |      |     |     |     |     |     |     |     |     |     |     |     |     |     |     |      |     |     |     |     |     |                       |     |    |    |     |     |     |           |  |
|                 |      |      |      |     |     |     |     |     |     |     |     |     |     |     |     |     |     |      |     |     |     |     |     |                       |     |    |    |     |     |     |           |  |
|                 |      |      |      |     |     |     |     |     |     |     |     |     |     |     |     |     |     |      |     |     |     |     |     |                       |     |    |    |     |     |     |           |  |
|                 |      |      |      |     |     |     |     |     |     |     |     |     |     |     |     |     |     |      |     |     |     |     |     |                       |     |    |    |     |     |     |           |  |
|                 |      |      |      |     |     |     |     |     |     |     |     |     |     |     |     |     |     |      |     |     |     |     |     |                       |     |    |    |     |     |     |           |  |
|                 |      |      |      |     |     |     |     |     |     |     |     |     |     |     |     |     |     |      |     |     |     |     |     |                       |     |    |    |     |     |     |           |  |
|                 |      |      |      |     |     |     |     |     |     |     |     |     |     |     |     |     |     |      |     |     |     |     |     |                       |     |    |    |     |     |     |           |  |
|                 |      |      |      |     |     |     |     |     |     |     |     |     |     |     |     |     |     |      |     |     |     |     |     |                       |     |    |    |     |     |     |           |  |
|                 |      |      |      |     |     |     |     |     |     |     |     |     |     |     |     |     |     |      |     |     |     |     |     |                       |     |    |    |     |     |     |           |  |
|                 |      |      |      |     |     |     |     |     |     |     |     |     |     |     |     |     |     |      |     |     |     |     |     |                       |     |    |    |     |     |     |           |  |
|                 |      |      |      |     |     |     |     |     |     |     |     |     |     |     |     |     |     |      |     |     |     |     |     |                       |     |    |    |     |     |     |           |  |
|                 |      |      |      |     |     |     |     |     |     |     |     |     |     |     |     |     |     |      |     |     |     |     |     |                       |     |    |    |     |     |     |           |  |
|                 |      |      |      |     |     |     |     |     |     |     |     |     |     |     |     |     |     |      |     |     |     |     |     |                       |     |    |    |     |     |     |           |  |
|                 |      |      |      |     |     |     |     |     |     |     |     |     |     |     |     |     |     |      |     |     |     |     |     |                       |     |    |    |     |     |     |           |  |
|                 |      |      |      |     |     |     |     |     |     |     |     |     |     |     |     |     |     |      |     |     |     |     |     |                       |     |    |    |     |     |     |           |  |
|                 |      |      |      |     |     |     |     |     |     |     |     |     |     |     |     |     |     |      |     |     |     |     |     |                       |     |    |    |     |     |     |           |  |
|                 |      |      |      |     |     |     |     |     |     |     |     |     |     |     |     |     |     |      |     |     |     |     |     |                       |     |    |    |     |     |     |           |  |
|                 |      |      |      |     |     |     |     |     |     |     |     |     |     |     |     |     |     |      |     |     |     |     |     |                       |     |    |    |     |     |     |           |  |
|                 |      |      |      |     |     |     |     |     |     |     |     |     |     |     |     |     |     |      |     |     |     |     |     |                       |     |    |    |     |     |     |           |  |
|                 |      |      |      |     |     |     |     |     |     |     |     |     |     |     |     |     |     |      |     |     |     |     |     |                       |     |    |    |     |     |     |           |  |
|                 |      |      |      |     |     |     |     |     |     |     |     |     |     |     |     |     |     |      |     |     |     |     |     |                       |     |    |    |     |     |     |           |  |
|                 |      |      |      |     |     |     |     |     |     |     |     |     |     |     |     |     |     |      |     |     |     |     |     |                       |     |    |    |     |     |     |           |  |
|                 |      |      |      |     |     |     |     |     |     |     |     |     |     |     |     |     |     |      |     |     |     |     |     |                       |     |    |    |     |     |     |           |  |
|                 |      |      |      |     |     |     |     |     |     |     |     |     |     |     |     |     |     |      |     |     |     |     |     |                       |     |    |    |     |     |     |           |  |
|                 |      |      |      |     |     |     |     |     |     |     |     |     |     |     |     |     |     |      |     |     |     |     |     |                       |     |    |    |     |     |     |           |  |
|                 |      |      |      |     |     |     |     |     |     |     |     |     |     |     |     |     |     |      |     |     |     |     |     |                       |     |    |    |     |     |     |           |  |
|                 |      |      |      |     |     |     |     |     |     |     |     |     |     |     |     |     |     |      |     |     |     |     |     |                       |     |    |    |     |     |     |           |  |
|                 |      |      |      |     |     |     |     |     |     |     |     |     |     |     |     |     |     |      |     |     |     |     |     |                       |     |    |    |     |     |     |           |  |
|                 |      |      |      |     |     |     |     |     |     |     |     |     |     |     |     |     |     |      |     |     |     |     |     |                       |     |    |    |     |     |     |           |  |
|                 |      |      |      |     |     |     |     |     |     |     |     |     |     |     |     |     |     |      |     |     |     |     |     |                       |     |    |    |     |     |     |           |  |
|                 |      |      |      |     |     |     |     |     |     |     |     |     |     |     |     |     |     |      |     |     |     |     |     |                       |     |    |    |     |     |     |           |  |
|                 |      |      |      |     |     |     |     |     |     |     |     |     |     |     |     |     |     |      |     |     |     |     |     |                       |     |    |    |     |     |     |           |  |
|                 |      |      |      |     |     |     |     |     |     |     |     |     |     |     |     |     |     |      |     |     |     |     |     |                       |     |    |    |     |     |     |           |  |
|                 |      |      |      |     |     |     |     |     |     |     |     |     |     |     |     |     |     |      |     |     |     |     |     |                       |     |    |    |     |     |     |           |  |
|                 |      |      |      |     |     |     |     |     |     |     |     |     |     |     |     |     |     |      |     |     |     |     |     |                       |     |    |    |     |     |     |           |  |
|                 |      |      |      |     |     |     |     |     |     |     |     |     |     |     |     |     |     |      |     |     |     |     |     |                       |     |    |    |     |     |     |           |  |
|                 |      |      |      |     |     |     |     |     |     |     |     |     |     |     |     |     |     |      |     |     |     |     |     |                       |     |    |    |     |     |     |           |  |
|                 |      |      |      |     |     |     |     |     |     |     |     |     |     |     |     |     |     |      |     |     |     |     |     |                       |     |    |    |     |     |     |           |  |
|                 |      |      |      |     |     |     |     |     |     |     |     |     |     |     |     |     |     |      |     |     |     |     |     |                       |     |    |    |     |     |     |           |  |
|                 |      |      |      |     |     |     |     |     |     |     |     |     |     |     |     |     |     |      |     |     |     |     |     |                       |     |    |    |     |     |     |           |  |
|                 |      |      |      |     |     |     |     |     |     |     |     |     |     |     |     |     |     |      |     |     |     |     |     |                       |     |    |    |     |     |     |           |  |
|                 |      |      |      |     |     |     |     |     |     |     |     |     |     |     |     |     |     |      |     |     |     |     |     |                       |     |    |    |     |     |     |           |  |
|                 |      |      |      |     |     |     |     |     |     |     |     |     |     |     |     |     |     |      |     |     |     |     |     |                       |     |    |    |     |     |     |           |  |
|                 |      |      |      |     |     |     |     |     |     |     |     |     |     |     |     |     |     |      |     |     |     |     |     |                       |     |    |    |     |     |     |           |  |
|                 |      |      |      |     |     |     |     |     |     |     |     |     |     |     |     |     |     |      |     |     |     |     |     |                       |     |    |    |     |     |     |           |  |
|                 |      |      |      |     |     |     |     |     |     |     |     |     |     |     |     |     |     |      |     |     |     |     |     |                       |     |    |    |     |     |     |           |  |
|                 |      |      |      |     |     |     |     |     |     |     |     |     |     |     |     |     |     |      |     |     |     |     |     |                       |     |    |    |     |     |     |           |  |
|                 |      |      |      |     |     |     |     |     |     |     |     |     |     |     |     |     |     |      |     |     |     |     |     |                       |     |    |    |     |     |     |           |  |
|                 |      |      |      |     |     |     |     |     |     |     |     |     |     |     |     |     |     |      |     |     |     |     |     |                       |     |    |    |     |     |     |           |  |
|                 |      |      |      |     |     |     |     |     |     |     |     |     |     |     |     |     |     |      |     |     |     |     |     |                       |     |    |    |     |     |     |           |  |
|                 |      |      |      |     |     |     |     |     |     |     |     |     |     |     |     |     |     |      |     |     |     |     |     |                       |     |    |    |     |     |     |           |  |
|                 |      |      |      |     |     |     |     |     |     |     |     |     |     |     |     |     |     |      |     |     |     |     |     |                       |     |    |    |     |     |     |           |  |
|                 |      |      |      |     |     |     |     |     |     |     |     |     |     |     |     |     |     |      |     |     |     |     |     |                       |     |    |    |     |     |     |           |  |
|                 |      |      |      |     |     |     |     |     |     |     |     |     |     |     |     |     |     |      |     |     |     |     |     |                       |     |    |    |     |     |     |           |  |
|                 |      |      |      |     |     |     |     |     |     |     |     |     |     |     |     |     |     |      |     |     |     |     |     |                       |     |    |    |     |     |     |           |  |
|                 |      |      |      |     |     |     |     |     |     |     |     |     |     |     |     |     |     |      |     |     |     |     |     |                       |     |    |    |     |     |     |           |  |
|                 |      |      |      |     |     |     |     |     |     |     |     |     |     |     |     |     |     |      |     |     |     |     |     |                       |     |    |    |     |     |     |           |  |
|                 |      |      |      |     |     |     |     |     |     |     |     |     |     |     |     |     |     |      |     |     |     |     |     |                       |     |    |    |     |     |     |           |  |
|                 |      |      |      |     |     |     |     |     |     |     |     |     |     |     |     |     |     |      |     |     |     |     |     |                       |     |    |    |     |     |     |           |  |
|                 |      |      |      |     |     |     |     |     |     |     |     |     |     |     |     |     |     |      |     |     |     |     |     |                       |     |    |    |     |     |     |           |  |
|                 |      |      |      |     |     |     |     |     |     |     |     |     |     |     |     |     |     |      |     |     |     |     |     |                       |     |    |    |     |     |     |           |  |
|                 |      |      |      |     |     |     |     |     |     |     |     |     |     |     |     |     |     |      |     |     |     |     |     |                       |     |    |    |     |     |     |           |  |
|                 |      |      |      |     |     |     |     |     |     |     |     |     |     |     |     |     |     |      |     |     |     |     |     |                       |     |    |    |     |     |     |           |  |
|                 |      |      |      |     |     |     |     |     |     |     |     |     |     |     |     |     |     |      |     |     |     |     |     |                       |     |    |    |     |     |     |           |  |
|                 |      |      |      |     |     |     |     |     |     |     |     |     |     |     |     |     |     |      |     |     |     |     |     |                       |     |    |    |     |     |     |           |  |
|                 |      |      |      |     |     |     |     |     |     |     |     |     |     |     |     |     |     |      |     |     |     |     |     |                       |     |    |    |     |     |     |           |  |
|                 |      |      |      |     |     |     |     |     |     |     |     |     |     |     |     |     |     |      |     |     |     |     |     |                       |     |    |    |     |     |     |           |  |
|                 |      |      |      |     |     |     |     |     |     |     |     |     |     |     |     |     |     |      |     |     |     |     |     |                       |     |    |    |     |     |     |           |  |
|                 |      |      |      |     |     |     |     |     |     |     |     |     |     |     |     |     |     |      |     |     |     |     |     |                       |     |    |    |     |     |     |           |  |
|                 |      |      |      |     |     |     |     |     |     |     |     |     |     |     |     |     |     |      |     |     |     |     |     |                       |     |    |    |     |     |     |           |  |
|                 |      |      |      |     |     |     |     |     |     |     |     |     |     |     |     |     |     |      |     |     |     |     |     |                       |     |    |    |     |     |     |           |  |
|                 |      |      |      |     |     |     |     |     |     |     |     |     |     |     |     |     |     |      |     |     |     |     |     |                       |     |    |    |     |     |     |           |  |
|                 |      |      |      |     |     |     |     |     |     |     |     |     |     |     |     |     |     |      |     |     |     |     |     |                       |     |    |    |     |     |     |           |  |
|                 |      |      |      |     |     |     |     |     |     |     |     |     |     |     |     |     |     |      |     |     |     |     |     |                       |     |    |    |     |     |     |           |  |
|                 |      |      |      |     |     |     |     |     |     |     |     |     |     |     |     |     |     |      |     |     |     |     |     |                       |     |    |    |     |     |     |           |  |
|                 |      |      |      |     |     |     |     |     |     |     |     |     |     |     |     |     |     |      |     |     |     |     |     |                       |     |    |    |     |     |     |           |  |
|                 |      |      |      |     |     |     |     |     |     |     |     |     |     |     |     |     |     |      |     |     |     |     |     |                       |     |    |    |     |     |     |           |  |
|                 |      |      |      |     |     |     |     |     |     |     |     |     |     |     |     |     |     |      |     |     |     |     |     |                       |     |    |    |     |     |     |           |  |
|                 |      |      |      |     |     |     |     |     |     |     |     |     |     |     |     |     |     |      |     |     |     |     |     |                       |     |    |    |     |     |     |           |  |
|                 |      |      |      |     |     |     |     |     |     |     |     |     |     |     |     |     |     |      |     |     |     |     |     |                       |     |    |    |     |     |     |           |  |
|                 |      |      |      |     |     |     |     |     |     |     |     |     |     |     |     |     |     |      |     |     |     |     |     |                       |     |    |    |     |     |     |           |  |
|                 |      |      |      |     |     |     |     |     |     |     |     |     |     |     |     |     |     |      |     |     |     |     |     |                       |     |    |    |     |     |     |           |  |
|                 |      |      |      |     |     |     |     |     |     |     |     |     |     |     |     |     |     |      |     |     |     |     |     |                       |     |    |    |     |     |     |           |  |
|                 |      |      |      |     |     |     |     |     |     |     |     |     |     |     |     |     |     |      |     |     |     |     |     |                       |     |    |    |     |     |     |           |  |
|                 |      |      |      |     |     |     |     |     |     |     |     |     |     |     |     |     |     |      |     |     |     |     |     |                       |     |    |    |     |     |     |           |  |
|                 |      |      |      |     |     |     |     |     |     |     |     |     |     |     |     |     |     |      |     |     |     |     |     |                       |     |    |    |     |     |     |           |  |
|                 |      |      |      |     |     |     |     |     |     |     |     |     |     |     |     |     |     |      |     |     |     |     |     |                       |     |    |    |     |     |     |           |  |
|                 |      |      |      |     |     |     |     |     |     |     |     |     |     |     |     |     |     |      |     |     |     |     |     |                       |     |    |    |     |     |     |           |  |
|                 |      |      |      |     |     |     |     |     |     |     |     |     |     |     |     |     |     |      |     |     |     |     |     |                       |     |    |    |     |     |     |           |  |
|                 |      |      |      |     |     |     |     |     |     |     |     |     |     |     |     |     |     |      |     |     |     |     |     |                       |     |    |    |     |     |     |           |  |
|                 |      |      |      |     |     |     |     |     |     |     |     |     |     |     |     |     |     |      |     |     |     |     |     |                       |     |    |    |     |     |     |           |  |
|                 |      |      |      |     |     |     |     |     |     |     |     |     |     |     |     |     |     |      |     |     |     |     |     |                       |     |    |    |     |     |     |           |  |
|                 |      |      |      |     |     |     |     |     |     |     |     |     |     |     |     |     |     |      |     |     |     |     |     |                       |     |    |    |     |     |     |           |  |
|                 |      |      |      |     |     |     |     |     |     |     |     |     |     |     |     |     |     |      |     |     |     |     |     |                       |     |    |    |     |     |     |           |  |
|                 |      |      |      |     |     |     |     |     |     |     |     |     |     |     |     |     |     |      |     |     |     |     |     |                       |     |    |    |     |     |     |           |  |
|                 |      |      |      |     |     |     |     |     |     |     |     |     |     |     |     |     |     |      |     |     |     |     |     |                       |     |    |    |     |     |     |           |  |
|                 |      |      |      |     |     |     |     |     |     |     |     |     |     |     |     |     |     |      |     |     |     |     |     |                       |     |    |    |     |     |     |           |  |
|                 |      |      |      |     |     |     |     |     |     |     |     |     |     |     |     |     |     |      |     |     |     |     |     |                       |     |    |    |     |     |     |           |  |
|                 |      |      |      |     |     |     |     |     |     |     |     |     |     |     |     |     |     |      |     |     |     |     |     |                       |     |    |    |     |     |     |           |  |
|                 |      |      |      |     |     |     |     |     |     |     |     |     |     |     |     |     |     |      |     |     |     |     |     |                       |     |    |    |     |     |     |           |  |
|                 |      |      |      |     |     |     |     |     |     |     |     |     |     |     |     |     |     |      |     |     |     |     |     |                       |     |    |    |     |     |     |           |  |
|                 |      |      |      |     |     |     |     |     |     |     |     |     |     |     |     |     |     |      |     |     |     |     |     |                       |     |    |    |     |     |     |           |  |
|                 |      |      |      |     |     |     |     |     |     |     |     |     |     |     |     |     |     |      |     |     |     |     |     |                       |     |    |    |     |     |     |           |  |
|                 |      |      |      |     |     |     |     |     |     |     |     |     |     |     |     |     |     |      |     |     |     |     |     |                       |     |    |    |     |     |     |           |  |
|                 |      |      |      |     |     |     |     |     |     |     |     |     |     |     |     |     |     |      |     |     |     |     |     |                       |     |    |    |     |     |     |           |  |
|                 |      |      |      |     |     |     |     |     |     |     |     |     |     |     |     |     |     |      |     |     |     |     |     |                       |     |    |    |     |     |     |           |  |
|                 |      |      |      |     |     |     |     |     |     |     |     |     |     |     |     |     |     |      |     |     |     |     |     |                       |     |    |    |     |     |     |           |  |
|                 |      |      |      |     |     |     |     |     |     |     |     |     |     |     |     |     |     |      |     |     |     |     |     |                       |     |    |    |     |     |     |           |  |
|                 |      |      |      |     |     |     |     |     |     |     |     |     |     |     |     |     |     |      |     |     |     |     |     |                       |     |    |    |     |     |     |           |  |
|                 |      |      |      |     |     |     |     |     |     |     |     |     |     |     |     |     |     |      |     |     |     |     |     |                       |     |    |    |     |     |     |           |  |
|                 |      |      |      |     |     |     |     |     |     |     |     |     |     |     |     |     |     |      |     |     |     |     |     |                       |     |    |    |     |     |     |           |  |
|                 |      |      |      |     |     |     |     |     |     |     |     |     |     |     |     |     |     |      |     |     |     |     |     |                       |     |    |    |     |     |     |           |  |
|                 |      |      |      |     |     |     |     |     |     |     |     |     |     |     |     |     |     |      |     |     |     |     |     |                       |     |    |    |     |     |     |           |  |
|                 |      |      |      |     |     |     |     |     |     |     |     |     |     |     |     |     |     |      |     |     |     |     |     |                       |     |    |    |     |     |     |           |  |
|                 |      |      |      |     |     |     |     |     |     |     |     |     |     |     |     |     |     |      |     |     |     |     |     |                       |     |    |    |     |     |     |           |  |
|                 |      |      |      |     |     |     |     |     |     |     |     |     |     |     |     |     |     |      |     |     |     |     |     |                       |     |    |    |     |     |     |           |  |
|                 |      |      |      |     |     |     |     |     |     |     |     |     |     |     |     |     |     |      |     |     |     |     |     |                       |     |    |    |     |     |     |           |  |
|                 |      |      |      |     |     |     |     |     |     |     |     |     |     |     |     |     |     |      |     |     |     |     |     |                       |     |    |    |     |     |     |           |  |
|                 |      |      |      |     |     |     |     |     |     |     |     |     |     |     |     |     |     |      |     |     |     |     |     |                       |     |    |    |     |     |     |           |  |
|                 |      |      |      |     |     |     |     |     |     |     |     |     |     |     |     |     |     |      |     |     |     |     |     |                       |     |    |    |     |     |     |           |  |
|                 |      |      |      |     |     |     |     |     |     |     |     |     |     |     |     |     |     |      |     |     |     |     |     |                       |     |    |    |     |     |     |           |  |
|                 |      |      |      |     |     |     |     |     |     |     |     |     |     |     |     |     |     |      |     |     |     |     |     |                       |     |    |    |     |     |     |           |  |
|                 |      |      |      |     |     |     |     |     |     |     |     |     |     |     |     |     |     |      |     |     |     |     |     |                       |     |    |    |     |     |     |           |  |
|                 |      |      |      |     |     |     |     |     |     |     |     |     |     |     |     |     |     |      |     |     |     |     |     |                       |     |    |    |     |     |     |           |  |
|                 |      |      |      |     |     |     |     |     |     |     |     |     |     |     |     |     |     |      |     |     |     |     |     |                       |     |    |    |     |     |     |           |  |
|                 |      |      |      |     |     |     |     |     |     |     |     |     |     |     |     |     |     |      |     |     |     |     |     |                       |     |    |    |     |     |     |           |  |
|                 |      |      |      |     |     |     |     |     |     |     |     |     |     |     |     |     |     |      |     |     |     |     |     |                       |     |    |    |     |     |     |           |  |
|                 |      |      |      |     |     |     |     |     |     |     |     |     |     |     |     |     |     |      |     |     |     |     |     |                       |     |    |    |     |     |     |           |  |
|                 |      |      |      |     |     |     |     |     |     |     |     |     |     |     |     |     |     |      |     |     |     |     |     |                       |     |    |    |     |     |     |           |  |
|                 |      |      |      |     |     |     |     |     |     |     |     |     |     |     |     |     |     |      |     |     |     |     |     |                       |     |    |    |     |     |     |           |  |
|                 |      |      |      |     |     |     |     |     |     |     |     |     |     |     |     |     |     |      |     |     |     |     |     |                       |     |    |    |     |     |     |           |  |
|                 |      |      |      |     |     |     |     |     |     |     |     |     |     |     |     |     |     |      |     |     |     |     |     |                       |     |    |    |     |     |     |           |  |
|                 |      |      |      |     |     |     |     |     |     |     |     |     |     |     |     |     |     |      |     |     |     |     |     |                       |     |    |    |     |     |     |           |  |
|                 |      |      |      |     |     |     |     |     |     |     |     |     |     |     |     |     |     |      |     |     |     |     |     |                       |     |    |    |     |     |     |           |  |
|                 |      |      |      |     |     |     |     |     |     |     |     |     |     |     |     |     |     |      |     |     |     |     |     |                       |     |    |    |     |     |     |           |  |
|                 |      |      |      |     |     |     |     |     |     |     |     |     |     |     |     |     |     |      |     |     |     |     |     |                       |     |    |    |     |     |     |           |  |
|                 |      |      |      |     |     |     |     |     |     |     |     |     |     |     |     |     |     |      |     |     |     |     |     |                       |     |    |    |     |     |     |           |  |
|                 |      |      |      |     |     |     |     |     |     |     |     |     |     |     |     |     |     |      |     |     |     |     |     |                       |     |    |    |     |     |     |           |  |
|                 |      |      |      |     |     |     |     |     |     |     |     |     |     |     |     |     |     |      |     |     |     |     |     |                       |     |    |    |     |     |     |           |  |
|                 |      |      |      |     |     |     |     |     |     |     |     |     |     |     |     |     |     |      |     |     |     |     |     |                       |     |    |    |     |     |     |           |  |
|                 |      |      |      |     |     |     |     |     |     |     |     |     |     |     |     |     |     |      |     |     |     |     |     |                       |     |    |    |     |     |     |           |  |
|                 |      |      |      |     |     |     |     |     |     |     |     |     |     |     |     |     |     |      |     |     |     |     |     |                       |     |    |    |     |     |     |           |  |
|                 |      |      |      |     |     |     |     |     |     |     |     |     |     |     |     |     |     |      |     |     |     |     |     |                       |     |    |    |     |     |     |           |  |
|                 |      |      |      |     |     |     |     |     |     |     |     |     |     |     |     |     |     |      |     |     |     |     |     |                       |     |    |    |     |     |     |           |  |
|                 |      |      |      |     |     |     |     |     |     |     |     |     |     |     |     |     |     |      |     |     |     |     |     |                       |     |    |    |     |     |     |           |  |
|                 |      |      |      |     |     |     |     |     |     |     |     |     |     |     |     |     |     |      |     |     |     |     |     |                       |     |    |    |     |     |     |           |  |
|                 |      |      |      |     |     |     |     |     |     |     |     |     |     |     |     |     |     |      |     |     |     |     |     |                       |     |    |    |     |     |     |           |  |
|                 |      |      |      |     |     |     |     |     |     |     |     |     |     |     |     |     |     |      |     |     |     |     |     |                       |     |    |    |     |     |     |           |  |
|                 |      |      |      |     |     |     |     |     |     |     |     |     |     |     |     |     |     |      |     |     |     |     |     |                       |     |    |    |     |     |     |           |  |
|                 |      |      |      |     |     |     |     |     |     |     |     |     |     |     |     |     |     |      |     |     |     |     |     |                       |     |    |    |     |     |     |           |  |
|                 |      |      |      |     |     |     |     |     |     |     |     |     |     |     |     |     |     |      |     |     |     |     |     |                       |     |    |    |     |     |     |           |  |
|                 |      |      |      |     |     |     |     |     |     |     |     |     |     |     |     |     |     |      |     |     |     |     |     |                       |     |    |    |     |     |     |           |  |
|                 |      |      |      |     |     |     |     |     |     |     |     |     |     |     |     |     |     |      |     |     |     |     |     |                       |     |    |    |     |     |     |           |  |
|                 |      |      |      |     |     |     |     |     |     |     |     |     |     |     |     |     |     |      |     |     |     |     |     |                       |     |    |    |     |     |     |           |  |
|                 |      |      |      |     |     |     |     |     |     |     |     |     |     |     |     |     |     |      |     |     |     |     |     |                       |     |    |    |     |     |     |           |  |
|                 |      |      |      |     |     |     |     |     |     |     |     |     |     |     |     |     |     |      |     |     |     |     |     |                       |     |    |    |     |     |     |           |  |
|                 |      |      |      |     |     |     |     |     |     |     |     |     |     |     |     |     |     |      |     |     |     |     |     |                       |     |    |    |     |     |     |           |  |
|                 |      |      |      |     |     |     |     |     |     |     |     |     |     |     |     |     |     |      |     |     |     |     |     |                       |     |    |    |     |     |     |           |  |
|                 |      |      |      |     |     |     |     |     |     |     |     |     |     |     |     |     |     |      |     |     |     |     |     |                       |     |    |    |     |     |     |           |  |
|                 |      |      |      |     |     |     |     |     |     |     |     |     |     |     |     |     |     |      |     |     |     |     |     |                       |     |    |    |     |     |     |           |  |
|                 |      |      |      |     |     |     |     |     |     |     |     |     |     |     |     |     |     |      |     |     |     |     |     |                       |     |    |    |     |     |     |           |  |
|                 |      |      |      |     |     |     |     |     |     |     |     |     |     |     |     |     |     |      |     |     |     |     |     |                       |     |    |    |     |     |     |           |  |
|                 |      |      |      |     |     |     |     |     |     |     |     |     |     |     |     |     |     |      |     |     |     |     |     |                       |     |    |    |     |     |     |           |  |
|                 |      |      |      |     |     |     |     |     |     |     |     |     |     |     |     |     |     |      |     |     |     |     |     |                       |     |    |    |     |     |     |           |  |
|                 |      |      |      |     |     |     |     |     |     |     |     |     |     |     |     |     |     |      |     |     |     |     |     |                       |     |    |    |     |     |     |           |  |
|                 |      |      |      |     |     |     |     |     |     |     |     |     |     |     |     |     |     |      |     |     |     |     |     |                       |     |    |    |     |     |     |           |  |
|                 |      |      |      |     |     |     |     |     |     |     |     |     |     |     |     |     |     |      |     |     |     |     |     |                       |     |    |    |     |     |     |           |  |
|                 |      |      |      |     |     |     |     |     |     |     |     |     |     |     |     |     |     |      |     |     |     |     |     |                       |     |    |    |     |     |     |           |  |
|                 |      |      |      |     |     |     |     |     |     |     |     |     |     |     |     |     |     |      |     |     |     |     |     |                       |     |    |    |     |     |     |           |  |
|                 |      |      |      |     |     |     |     |     |     |     |     |     |     |     |     |     |     |      |     |     |     |     |     |                       |     |    |    |     |     |     |           |  |
|                 |      |      |      |     |     |     |     |     |     |     |     |     |     |     |     |     |     |      |     |     |     |     |     |                       |     |    |    |     |     |     |           |  |
|                 |      |      |      |     |     |     |     |     |     |     |     |     |     |     |     |     |     |      |     |     |     |     |     |                       |     |    |    |     |     |     |           |  |
|                 |      |      |      |     |     |     |     |     |     |     |     |     |     |     |     |     |     |      |     |     |     |     |     |                       |     |    |    |     |     |     |           |  |
|                 |      |      |      |     |     |     |     |     |     |     |     |     |     |     |     |     |     |      |     |     |     |     |     |                       |     |    |    |     |     |     |           |  |
|                 |      |      |      |     |     |     |     |     |     |     |     |     |     |     |     |     |     |      |     |     |     |     |     |                       |     |    |    |     |     |     |           |  |
|                 |      |      |      |     |     |     |     |     |     |     |     |     |     |     |     |     |     |      |     |     |     |     |     |                       |     |    |    |     |     |     |           |  |
|                 |      |      |      |     |     |     |     |     |     |     |     |     |     |     |     |     |     |      |     |     |     |     |     |                       |     |    |    |     |     |     |           |  |
|                 |      |      |      |     |     |     |     |     |     |     |     |     |     |     |     |     |     |      |     |     |     |     |     |                       |     |    |    |     |     |     |           |  |
|                 |      |      |      |     |     |     |     |     |     |     |     |     |     |     |     |     |     |      |     |     |     |     |     |                       |     |    |    |     |     |     |           |  |
|                 |      |      |      |     |     |     |     |     |     |     |     |     |     |     |     |     |     |      |     |     |     |     |     |                       |     |    |    |     |     |     |           |  |
|                 |      |      |      |     |     |     |     |     |     |     |     |     |     |     |     |     |     |      |     |     |     |     |     |                       |     |    |    |     |     |     |           |  |
|                 |      |      |      |     |     |     |     |     |     |     |     |     |     |     |     |     |     |      |     |     |     |     |     |                       |     |    |    |     |     |     |           |  |
|                 |      |      |      |     |     |     |     |     |     |     |     |     |     |     |     |     |     |      |     |     |     |     |     |                       |     |    |    |     |     |     |           |  |
|                 |      |      |      |     |     |     |     |     |     |     |     |     |     |     |     |     |     |      |     |     |     |     |     |                       |     |    |    |     |     |     |           |  |
|                 |      |      |      |     |     |     |     |     |     |     |     |     |     |     |     |     |     |      |     |     |     |     |     |                       |     |    |    |     |     |     |           |  |
|                 |      |      |      |     |     |     |     |     |     |     |     |     |     |     |     |     |     |      |     |     |     |     |     |                       |     |    |    |     |     |     |           |  |
|                 |      |      |      |     |     |     |     |     |     |     |     |     |     |     |     |     |     |      |     |     |     |     |     |                       |     |    |    |     |     |     |           |  |
|                 |      |      |      |     |     |     |     |     |     |     |     |     |     |     |     |     |     |      |     |     |     |     |     |                       |     |    |    |     |     |     |           |  |
|                 |      |      |      |     |     |     |     |     |     |     |     |     |     |     |     |     |     |      |     |     |     |     |     |                       |     |    |    |     |     |     |           |  |
|                 |      |      |      |     |     |     |     |     |     |     |     |     |     |     |     |     |     |      |     |     |     |     |     |                       |     |    |    |     |     |     |           |  |
|                 |      |      |      |     |     |     |     |     |     |     |     |     |     |     |     |     |     |      |     |     |     |     |     |                       |     |    |    |     |     |     |           |  |
|                 |      |      |      |     |     |     |     |     |     |     |     |     |     |     |     |     |     |      |     |     |     |     |     |                       |     |    |    |     |     |     |           |  |
|                 |      |      |      |     |     |     |     |     |     |     |     |     |     |     |     |     |     |      |     |     |     |     |     |                       |     |    |    |     |     |     |           |  |
|                 |      |      |      |     |     |     |     |     |     |     |     |     |     |     |     |     |     |      |     |     |     |     |     |                       |     |    |    |     |     |     |           |  |
|                 |      |      |      |     |     |     |     |     |     |     |     |     |     |     |     |     |     |      |     |     |     |     |     |                       |     |    |    |     |     |     |           |  |
|                 |      |      |      |     |     |     |     |     |     |     |     |     |     |     |     |     |     |      |     |     |     |     |     |                       |     |    |    |     |     |     |           |  |
|                 |      |      |      |     |     |     |     |     |     |     |     |     |     |     |     |     |     |      |     |     |     |     |     |                       |     |    |    |     |     |     |           |  |
|                 |      |      |      |     |     |     |     |     |     |     |     |     |     |     |     |     |     |      |     |     |     |     |     |                       |     |    |    |     |     |     |           |  |
|                 |      |      |      |     |     |     |     |     |     |     |     |     |     |     |     |     |     |      |     |     |     |     |     |                       |     |    |    |     |     |     |           |  |
|                 |      |      |      |     |     |     |     |     |     |     |     |     |     |     |     |     |     |      |     |     |     |     |     |                       |     |    |    |     |     |     |           |  |
|                 |      |      |      |     |     |     |     |     |     |     |     |     |     |     |     |     |     |      |     |     |     |     |     |                       |     |    |    |     |     |     |           |  |
|                 |      |      |      |     |     |     |     |     |     |     |     |     |     |     |     |     |     |      |     |     |     |     |     |                       |     |    |    |     |     |     |           |  |
|                 |      |      |      |     |     |     |     |     |     |     |     |     |     |     |     |     |     |      |     |     |     |     |     |                       |     |    |    |     |     |     |           |  |
|                 |      |      |      |     |     |     |     |     |     |     |     |     |     |     |     |     |     |      |     |     |     |     |     |                       |     |    |    |     |     |     |           |  |
|                 |      |      |      |     |     |     |     |     |     |     |     |     |     |     |     |     |     |      |     |     |     |     |     |                       |     |    |    |     |     |     |           |  |
|                 |      |      |      |     |     |     |     |     |     |     |     |     |     |     |     |     |     |      |     |     |     |     |     |                       |     |    |    |     |     |     |           |  |
|                 |      |      |      |     |     |     |     |     |     |     |     |     |     |     |     |     |     |      |     |     |     |     |     |                       |     |    |    |     |     |     |           |  |
|                 |      |      |      |     |     |     |     |     |     |     |     |     |     |     |     |     |     |      |     |     |     |     |     |                       |     |    |    |     |     |     |           |  |
|                 |      |      |      |     |     |     |     |     |     |     |     |     |     |     |     |     |     |      |     |     |     |     |     |                       |     |    |    |     |     |     |           |  |
|                 |      |      |      |     |     |     |     |     |     |     |     |     |     |     |     |     |     |      |     |     |     |     |     |                       |     |    |    |     |     |     |           |  |
|                 |      |      |      |     |     |     |     |     |     |     |     |     |     |     |     |     |     |      |     |     |     |     |     |                       |     |    |    |     |     |     |           |  |
|                 |      |      |      |     |     |     |     |     |     |     |     |     |     |     |     |     |     |      |     |     |     |     |     |                       |     |    |    |     |     |     |           |  |

# indicates amino acid positions located within the QRDR

<sup>a</sup> Consensus residues reported for a total of 21 fluoroquinolone-susceptible isolates, bolded residues indicate the most prevalent amino acid

-- indicates amino acid deletions at GyrA positions 815, 826, and 827

Table S2b: Summary of all topoisomerase IV amino acid variations among fluoroquinolone-susceptible *S. aureus*, including ATCC 29213 and 13 ocular isolates assigned to Group 1

|                             | ParC   |      |      |        |        |        |     |        |        |     |        |        |     |        |        |        |        |        |        | ParE   |    |        |        |        |        |     |        |       |        |        |     |        |        |  |  |  |  |  |
|-----------------------------|--------|------|------|--------|--------|--------|-----|--------|--------|-----|--------|--------|-----|--------|--------|--------|--------|--------|--------|--------|----|--------|--------|--------|--------|-----|--------|-------|--------|--------|-----|--------|--------|--|--|--|--|--|
|                             | 45     | 80 # | 84 # | 144    | 223    | 267    | 320 | 372    | 400    | 402 | 404    | 410    | 437 | 521    | 594    | 641    | 650    | 656    | 688    | 694    | 70 | 107    | 139    | 230    | 327    | 330 | 422    | 432 # | 478    | 530    | 585 | 596    | 609    |  |  |  |  |  |
| GenBank strains             |        |      |      |        |        |        |     |        |        |     |        |        |     |        |        |        |        |        |        |        |    |        |        |        |        |     |        |       |        |        |     |        |        |  |  |  |  |  |
| Newman                      | I      | S    | E    | P      | I      | S      | S   | R      | R      | A   | E      | Y      | E   | F      | F      | D      | K      | V      | A      | M      | I  | G      | N      | S      | V      | P   | E      | D     | H      | G      | P   | E      | V      |  |  |  |  |  |
| N315                        | I      | S    | E    | P      | I      | S      | S   | R      | R      | A   | E      | F      | E   | F      | F      | D      | K      | V      | A      | M      | I  | G      | N      | S      | V      | P   | E      | D     | H      | G      | P   | E      | V      |  |  |  |  |  |
| NCTC8325                    | I      | S    | E    | P      | I      | S      | S   | R      | R      | A   | E      | Y      | E   | F      | F      | D      | K      | V      | A      | M      | I  | G      | N      | S      | V      | P   | E      | D     | H      | G      | P   | E      | V      |  |  |  |  |  |
| RF122                       | I      | S    | E    | P      | I      | S      | S   | H      | R      | A   | E      | Y      | E   | F      | F      | N      | K      | I      | A      | M      | I  | S      | N      | G      | I      | P   | D      | D     | H      | G      | P   | E      | L      |  |  |  |  |  |
| MSSA476                     | I      | S    | E    | P      | I      | S      | S   | R      | R      | A   | E      | Y      | E   | F      | F      | D      | K      | V      | A      | V      | I  | G      | N      | S      | V      | P   | E      | D     | H      | D      | P   | E      | V      |  |  |  |  |  |
| COL                         | I      | S    | E    | P      | I      | S      | S   | R      | R      | A   | E      | Y      | E   | F      | F      | D      | K      | V      | A      | M      | I  | G      | N      | S      | V      | P   | E      | D     | H      | G      | P   | E      | V      |  |  |  |  |  |
| MW2                         | I      | S    | E    | P      | I      | S      | S   | R      | C      | A   | E      | Y      | E   | F      | F      | D      | K      | V      | A      | M      | I  | G      | N      | S      | V      | P   | E      | D     | H      | G      | P   | E      | V      |  |  |  |  |  |
| Study strains               |        |      |      |        |        |        |     |        |        |     |        |        |     |        |        |        |        |        |        |        |    |        |        |        |        |     |        |       |        |        |     |        |        |  |  |  |  |  |
| ATCC29213                   | I      | S    | E    | P      | I      | S      | S   | R      | R      | A   | E      | F      | E   | F      | F      | D      | K      | V      | A      | M      | I  | G      | S      | S      | V      | P   | E      | D     | H      | G      | P   | E      | V      |  |  |  |  |  |
| Sau31                       | I      | S    | E    | P      | I      | S      | S   | R      | R      | A   | G      | F      | E   | F      | F      | D      | R      | V      | A      | M      | I  | G      | N      | S      | V      | P   | E      | D     | H      | G      | P   | E      | V      |  |  |  |  |  |
| Sau38                       | I      | S    | E    | S      | I      | S      | S   | R      | R      | A   | E      | Y      | E   | Y      | F      | D      | K      | I      | A      | M      | I  | G      | N      | S      | V      | P   | D      | D     | H      | G      | P   | E      | V      |  |  |  |  |  |
| Sau12                       | I      | S    | E    | P      | I      | S      | S   | R      | R      | A   | E      | Y      | E   | F      | F      | D      | K      | V      | A      | M      | I  | G      | N      | S      | V      | P   | E      | D     | H      | G      | P   | E      | V      |  |  |  |  |  |
| Sau13                       | I      | S    | E    | P      | I      | S      | S   | R      | R      | A   | E      | Y      | E   | F      | F      | D      | K      | V      | A      | M      | I  | G      | N      | S      | V      | P   | E      | D     | H      | G      | P   | E      | V      |  |  |  |  |  |
| Sau32                       | M      | S    | E    | P      | I      | G      | S   | R      | R      | A   | E      | Y      | E   | F      | Y      | D      | K      | V      | V      | M      | I  | G      | N      | S      | V      | P   | D      | D     | H      | G      | P   | D      | V      |  |  |  |  |  |
| Sau33                       | I      | S    | E    | S      | I      | S      | S   | R      | R      | A   | E      | Y      | E   | Y      | F      | D      | K      | I      | A      | M      | I  | G      | N      | S      | V      | P   | D      | D     | H      | G      | P   | E      | V      |  |  |  |  |  |
| Sau34                       | I      | S    | E    | P      | V      | S      | S   | R      | R      | A   | E      | F      | E   | F      | F      | D      | K      | V      | A      | M      | I  | G      | N      | S      | V      | P   | E      | D     | Y      | G      | P   | E      | V      |  |  |  |  |  |
| Sau35                       | I      | S    | E    | P      | I      | S      | S   | R      | R      | A   | E      | Y      | E   | F      | F      | D      | K      | V      | A      | M      | I  | G      | N      | S      | V      | P   | E      | D     | H      | G      | P   | E      | V      |  |  |  |  |  |
| Sau36                       | I      | S    | E    | P      | V      | S      | S   | R      | R      | A   | E      | F      | E   | F      | F      | D      | K      | V      | A      | M      | I  | G      | N      | S      | V      | P   | E      | D     | Y      | G      | P   | E      | V      |  |  |  |  |  |
| Sau37                       | I      | S    | E    | P      | V      | S      | S   | R      | R      | A   | E      | F      | E   | F      | F      | D      | K      | V      | A      | M      | I  | G      | N      | S      | V      | P   | E      | D     | Y      | G      | P   | E      | V      |  |  |  |  |  |
| Sau39                       | I      | S    | E    | P      | V      | S      | S   | R      | R      | A   | E      | F      | E   | F      | F      | D      | K      | V      | A      | M      | I  | G      | N      | S      | V      | P   | E      | D     | H      | G      | P   | E      | V      |  |  |  |  |  |
| Sau7                        | I      | S    | E    | P      | I      | S      | S   | R      | R      | A   | E      | Y      | E   | F      | F      | D      | K      | V      | A      | M      | I  | G      | N      | S      | V      | P   | E      | D     | H      | G      | P   | E      | V      |  |  |  |  |  |
| Sau8                        | I      | S    | E    | P      | I      | S      | S   | R      | R      | A   | E      | Y      | E   | F      | F      | D      | K      | V      | A      | M      | I  | G      | N      | S      | V      | P   | E      | D     | H      | G      | P   | E      | V      |  |  |  |  |  |
| FQ-S Consensus <sup>a</sup> | I<br>M | S    | E    | P<br>S | I<br>V | S<br>G | S   | R<br>H | R<br>C | A   | E<br>G | Y<br>F | E   | F<br>Y | F<br>Y | D<br>N | K<br>R | V<br>I | A<br>V | M<br>V | I  | G<br>S | N<br>S | S<br>G | V<br>I | P   | E<br>D | D     | H<br>Y | G<br>D | P   | E<br>D | V<br>L |  |  |  |  |  |

# indicates amino acid positions located within the QRDR

<sup>a</sup> Consensus residues reported for a total of 21 fluoroquinolone-susceptible isolates, bolded residues indicate the most prevalent amino acid

Table S3: Summary of all DNA gyrase and topoisomerase IV amino acid variations and MIC values among 12 fluoroquinolone-resistant ocular isolates assigned to Group 2

|                             | GyrA |      |      |     |     |     |     |     |     |     |     | GyrB | ParC |      |     |     |     | ParE |     |       |     | MIC (µg/ml) |      |      |      |      |  |
|-----------------------------|------|------|------|-----|-----|-----|-----|-----|-----|-----|-----|------|------|------|-----|-----|-----|------|-----|-------|-----|-------------|------|------|------|------|--|
|                             | 84 # | 85 # | 88 # | 275 | 325 | 402 | 815 | 818 | 826 | 827 | 859 | 169  | 80 # | 84 # | 320 | 402 | 437 | 70   | 330 | 432 # | 585 | BES         | MXF  | GAT  | CIP  | LVX  |  |
| FQ-S Consensus <sup>a</sup> | S    | S    | E    | E   | T   | D   | E   | T   | S   | T   | E   | D    | S    | E    | S   | A   | E   | I    | P   | D     | P   | 0.03        | 0.06 | 0.12 | 0.25 | 0.25 |  |
| Study strains               |      |      |      |     |     |     |     |     |     |     |     |      |      |      |     |     |     |      |     |       |     |             |      |      |      |      |  |
| Sau21                       | L    | .    | .    | .   | .   | .   | .   | .   | .   | .   | .   | .    | Y    | .    | .   | .   | .   | .    | .   | .     | .   | 0.25        | 2    | 2    | 16   | 4    |  |
| Sau22                       | L    | .    | .    | .   | .   | .   | .   | .   | .   | .   | .   | .    | F    | .    | .   | .   | .   | .    | .   | .     | .   | 0.25        | 2    | 2    | 16   | 8    |  |
| Sau30                       | L    | .    | .    | .   | .   | .   | .   | .   | .   | .   | .   | .    | F    | .    | .   | .   | .   | .    | .   | .     | .   | 0.25        | 1    | 1    | 16   | 4    |  |
| Sau42                       | L    | .    | .    | .   | .   | .   | .   | .   | .   | .   | .   | .    | Y    | .    | .   | .   | .   | .    | .   | .     | .   | 0.25        | 2    | 2    | 8    | 4    |  |
| Sau43                       | L    | .    | .    | .   | .   | .   | .   | .   | .   | .   | .   | .    | Y    | .    | .   | .   | .   | .    | .   | .     | .   | 0.25        | 2    | 2    | 16   | 8    |  |
| Sau11                       | L    | .    | .    | .   | .   | .   | .   | .   | .   | .   | .   | .    | Y    | .    | .   | .   | .   | .    | .   | .     | .   | 0.5         | 2    | 2    | 16   | 4    |  |
| Sau19                       | L    | .    | .    | .   | .   | .   | .   | .   | .   | .   | .   | .    | Y    | .    | .   | .   | .   | .    | .   | .     | .   | 0.5         | 2    | 2    | 16   | 4    |  |
| Sau23                       | L    | .    | .    | .   | .   | .   | .   | .   | .   | .   | .   | .    | Y    | .    | .   | .   | .   | .    | .   | .     | .   | 0.5         | 2    | 2    | 16   | 8    |  |
| Sau41                       | L    | .    | .    | .   | .   | .   | .   | .   | .   | .   | .   | .    | Y    | .    | .   | .   | .   | .    | .   | .     | .   | 0.5         | 2    | 2    | 16   | 4    |  |
| Sau45                       | L    | .    | .    | .   | .   | .   | .   | .   | .   | .   | .   | .    | Y    | .    | .   | .   | .   | .    | .   | .     | .   | 0.5         | 2    | 2    | 16   | 8    |  |
| Sau5                        | L    | .    | .    | .   | .   | .   | .   | .   | .   | .   | .   | .    | F    | .    | .   | .   | .   | .    | .   | .     | .   | 0.5         | 2    | 2    | 32   | 8    |  |
| Sau48                       | L    | .    | .    | .   | .   | .   | .   | .   | .   | .   | .   | .    | F    | .    | .   | .   | .   | .    | .   | S     | .   | 1           | 4    | 8    | 256  | 32   |  |
| MIC <sub>50</sub>           |      |      |      |     |     |     |     |     |     |     |     |      |      |      |     |     |     |      |     |       |     | 0.5         | 2    | 2    | 16   | 8    |  |

Periods indicate no change from the most prevalent amino acid in the fluoroquinolone-susceptible consensus sequence

# indicates amino acid positions located within the QRDR

<sup>a</sup> Consensus residues reported for a total of 21 fluoroquinolone-susceptible isolates, bolded residues indicate the most prevalent amino acid (see Tables S2a and S2b)

-- indicates amino acid deletions at GyrA positions 815, 826, and 827

Table S4: Summary of all DNA gyrase and topoisomerase IV amino acid variations and MIC values among 6 fluoroquinolone-resistant ocular isolates assigned to Group 3

|                             | GyrA |      |      |     |     |     |     |     |     |     |     | GyrB | ParC |      |     |     |     | ParE |     |       |     | MIC (µg/ml) |      |      |      |      |  |
|-----------------------------|------|------|------|-----|-----|-----|-----|-----|-----|-----|-----|------|------|------|-----|-----|-----|------|-----|-------|-----|-------------|------|------|------|------|--|
|                             | 84 # | 85 # | 88 # | 275 | 325 | 402 | 815 | 818 | 826 | 827 | 859 | 169  | 80 # | 84 # | 320 | 402 | 437 | 70   | 330 | 432 # | 585 | BES         | MXF  | GAT  | CIP  | LVX  |  |
| FQ-S Consensus <sup>a</sup> | S    | S    | E    | E   | T   | D   | E   | T   | S   | T   | E   | D    | S    | E    | S   | A   | E   | I    | P   | D     | P   | 0.03        | 0.06 | 0.12 | 0.25 | 0.25 |  |
| Study strains               |      |      |      |     |     |     |     |     |     |     |     |      |      |      |     |     |     |      |     |       |     |             |      |      |      |      |  |
| Sau1                        | L    | .    | .    | .   | .   | .   | .   | .   | .   | .   | .   | .    | Y    | G    | .   | .   | .   | .    | .   | .     | .   | 1           | 8    | 8    | 256  | 64   |  |
| Sau2                        | L    | .    | .    | .   | .   | .   | .   | .   | .   | .   | .   | .    | Y    | G    | .   | V   | .   | .    | .   | .     | .   | 1           | 8    | 4    | 256  | 32   |  |
| Sau28                       | L    | .    | .    | .   | .   | .   | .   | .   | .   | .   | .   | .    | Y    | G    | .   | .   | .   | .    | .   | .     | .   | 1           | 8    | 8    | 256  | 64   |  |
| Sau29                       | L    | .    | .    | .   | .   | .   | .   | .   | .   | .   | .   | .    | Y    | G    | .   | .   | .   | .    | .   | .     | .   | 1           | 8    | 8    | 256  | 64   |  |
| Sau44                       | L    | .    | .    | .   | .   | .   | .   | .   | .   | .   | .   | .    | Y    | G    | .   | .   | .   | .    | .   | .     | .   | 1           | 8    | 8    | 256  | 64   |  |
| Sau16                       | L    | .    | .    | .   | .   | .   | .   | .   | .   | .   | .   | .    | Y    | G    | .   | .   | .   | .    | .   | .     | .   | 2           | 16   | 16   | 256  | 128  |  |
| MIC <sub>50</sub>           |      |      |      |     |     |     |     |     |     |     |     |      |      |      |     |     |     |      |     |       |     | 1           | 8    | 8    | 256  | 64   |  |

Periods indicate no change from the most prevalent amino acid in the fluoroquinolone-susceptible consensus sequence

# indicates amino acid positions located within the QRDR

<sup>a</sup> Consensus residues reported for a total of 21 fluoroquinolone-susceptible isolates, bolded residues indicate the most prevalent amino acid (see Tables S2a and S2b)

-- indicates amino acid deletions at GyrA positions 815, 826, and 827

Table S5: Summary of all DNA gyrase and topoisomerase IV amino acid variations and MIC values among 3 fluoroquinolone-resistant ocular isolates assigned to Group 4

|                             | GyrA |      |      |     |     |     |     |     |     |     |     | GyrB | ParC |      |     |     |     | ParE |     |       |     | MIC (µg/ml) |      |      |      |      |  |
|-----------------------------|------|------|------|-----|-----|-----|-----|-----|-----|-----|-----|------|------|------|-----|-----|-----|------|-----|-------|-----|-------------|------|------|------|------|--|
|                             | 84 # | 85 # | 88 # | 275 | 325 | 402 | 815 | 818 | 826 | 827 | 859 | 169  | 80 # | 84 # | 320 | 402 | 437 | 70   | 330 | 432 # | 585 | BES         | MXF  | GAT  | CIP  | LVX  |  |
| FQ-S Consensus <sup>a</sup> | S    | S    | E    | E   | T   | D   | E   | T   | S   | T   | E   | D    | S    | E    | S   | A   | E   | I    | P   | D     | P   | 0.03        | 0.06 | 0.12 | 0.25 | 0.25 |  |
| Study strains               |      |      |      |     |     |     |     |     |     |     |     |      |      |      |     |     |     |      |     |       |     |             |      |      |      |      |  |
| Sau18                       | L    | P    | .    | .   | .   | E   | --  | E   | --  | --  | V   | .    | F    | .    | .   | .   | .   | .    | .   | N     | .   | 4           | 8    | 16   | 128  | 128  |  |
| Sau51                       | L    | P    | .    | .   | .   | .   | .   | .   | .   | .   | .   | .    | F    | .    | .   | .   | .   | .    | .   | H     | .   | 4           | 32   | 32   | 128  | 512  |  |
| Sau52                       | L    | P    | .    | .   | .   | .   | .   | .   | .   | .   | .   | .    | Y    | .    | .   | .   | .   | .    | .   | H     | .   | 4           | 64   | 32   | 128  | 512  |  |
| Median <sup>b</sup>         |      |      |      |     |     |     |     |     |     |     |     |      |      |      |     |     |     |      |     |       |     | 4           | 32   | 32   | 128  | 512  |  |

Periods indicate no change from the most prevalent amino acid in the fluoroquinolone-susceptible consensus sequence

# indicates amino acid positions located within the QRDR

<sup>a</sup> Consensus residues reported for a total of 21 fluoroquinolone-susceptible isolates, bolded residues indicate the most prevalent amino acid (see Tables S2a and S2b)

-- indicates amino acid deletions at GyrA positions 815, 826, and 827

<sup>b</sup> Median value was used because the MIC<sub>50</sub> value could not be calculated for n<5 isolates

Table S6: Summary of all DNA gyrase and topoisomerase IV amino acid variations and MIC values among 10 fluoroquinolone-resistant ocular isolates assigned to Group 5

|                             | GyrA |      |      |     |     |     |     |     |     |     |     | GyrB | ParC |      |     |     |     | ParE |     |       |     | MIC (µg/ml) |      |      |      |      |  |
|-----------------------------|------|------|------|-----|-----|-----|-----|-----|-----|-----|-----|------|------|------|-----|-----|-----|------|-----|-------|-----|-------------|------|------|------|------|--|
|                             | 84 # | 85 # | 88 # | 275 | 325 | 402 | 815 | 818 | 826 | 827 | 859 | 169  | 80 # | 84 # | 320 | 402 | 437 | 70   | 330 | 432 # | 585 | BES         | MXF  | GAT  | CIP  | LVX  |  |
| FQ-S Consensus <sup>a</sup> | S    | S    | E    | E   | T   | D   | E   | T   | S   | T   | E   | D    | S    | E    | S   | A   | E   | I    | P   | D     | P   | 0.03        | 0.06 | 0.12 | 0.25 | 0.25 |  |
| Study strains               |      |      |      |     |     |     |     |     |     |     |     |      |      |      |     |     |     |      |     |       |     |             |      |      |      |      |  |
| Sau49                       | L    | P    | .    | .   | .   | .   | .   | .   | .   | .   | .   | .    | Y    | G    | .   | .   | D   | .    | .   | .     | .   | 4           | 32   | 32   | 256  | 512  |  |
| Sau15                       | L    | P    | .    | .   | .   | .   | .   | .   | .   | .   | .   | .    | Y    | G    | .   | .   | .   | .    | .   | .     | .   | 4           | 32   | 64   | 256  | 512  |  |
| Sau26                       | L    | P    | .    | .   | .   | .   | .   | .   | .   | .   | .   | .    | Y    | G    | .   | .   | .   | .    | .   | .     | .   | 4           | 64   | 64   | 256  | 512  |  |
| Sau3                        | L    | P    | .    | .   | .   | .   | .   | .   | .   | .   | .   | .    | Y    | G    | .   | .   | .   | .    | S   | .     | .   | 4           | 32   | 64   | 256  | 512  |  |
| Sau40                       | L    | P    | .    | .   | .   | .   | .   | .   | .   | .   | .   | .    | Y    | G    | .   | .   | .   | .    | .   | .     | .   | 4           | 64   | 64   | 256  | 512  |  |
| Sau47                       | L    | P    | .    | .   | .   | .   | .   | .   | .   | .   | .   | .    | Y    | G    | .   | .   | .   | .    | S   | .     | .   | 4           | 32   | 64   | 256  | 512  |  |
| Sau50                       | L    | P    | .    | .   | .   | .   | .   | .   | .   | .   | .   | .    | Y    | G    | .   | .   | .   | .    | S   | .     | .   | 4           | 64   | 64   | 256  | 512  |  |
| Sau54                       | L    | P    | .    | .   | .   | .   | .   | .   | .   | .   | .   | .    | Y    | G    | .   | .   | .   | .    | .   | .     | .   | 4           | 64   | 64   | 256  | 1024 |  |
| Sau55                       | L    | P    | .    | .   | .   | .   | .   | .   | .   | .   | .   | .    | Y    | G    | .   | .   | .   | .    | .   | .     | .   | 4           | 64   | 64   | 256  | 512  |  |
| Sau6                        | L    | P    | .    | .   | .   | .   | .   | .   | .   | .   | .   | .    | Y    | G    | .   | .   | .   | .    | .   | .     | .   | 4           | 32   | 64   | 256  | 512  |  |
| MIC <sub>50</sub>           |      |      |      |     |     |     |     |     |     |     |     |      |      |      |     |     |     |      |     |       |     | 4           | 64   | 64   | 256  | 512  |  |

Periods indicate no change from the most prevalent amino acid in the fluoroquinolone-susceptible consensus sequence

# indicates amino acid positions located within the QRDR

<sup>a</sup> Consensus residues reported for a total of 21 fluoroquinolone-susceptible isolates, bolded residues indicate the most prevalent amino acid (see Tables S2a and S2b)

-- indicates amino acid deletions at GyrA positions 815, 826, and 827



Table S7: Summary of all DNA gyrase and topoisomerase IV amino acid variations and MIC values among 8 fluoroquinolone-resistant ocular isolates assigned to Group 6

|                             |       | GyrA |      |      |     |     |     |     |     |     |     | GyrB | ParC |      |      |     |     | ParE |    |     |       | MIC (µg/ml) |      |      |      |      |      |
|-----------------------------|-------|------|------|------|-----|-----|-----|-----|-----|-----|-----|------|------|------|------|-----|-----|------|----|-----|-------|-------------|------|------|------|------|------|
|                             |       | 84 # | 85 # | 88 # | 275 | 325 | 402 | 815 | 818 | 826 | 827 | 859  | 169  | 80 # | 84 # | 320 | 402 | 437  | 70 | 330 | 432 # | 585         | BES  | MXF  | GAT  | CIP  | LVX  |
| FQ-S Consensus <sup>a</sup> |       | S    | S    | E    | E   | T   | D   | E   | T   | S   | T   | E    | D    | S    | E    | S   | A   | E    | I  | P   | D     | P           | 0.03 | 0.06 | 0.12 | 0.25 | 0.25 |
| Study strains               |       |      |      |      |     |     |     |     |     |     |     |      |      |      |      |     |     |      |    |     |       |             |      |      |      |      |      |
|                             | Sau25 | L    | .    | A    | D   | .   | .   | .   | .   | .   | .   | .    | .    | Y    | G    | .   | .   | .    | .  | .   | .     | .           | 2    | 32   | 32   | 256  | 256  |
|                             | Sau46 | L    | .    | A    | .   | .   | .   | .   | .   | .   | .   | .    | .    | Y    | G    | F   | .   | .    | .  | .   | .     | .           | 2    | 32   | 32   | 256  | 256  |
|                             | Sau27 | L    | .    | A    | .   | .   | .   | .   | .   | .   | .   | .    | .    | Y    | G    | .   | .   | .    | .  | .   | .     | .           | 4    | 32   | 32   | 256  | 256  |
|                             | Sau17 | L    | .    | K    | .   | .   | .   | .   | .   | .   | .   | .    | .    | Y    | G    | .   | .   | .    | .  | .   | .     | .           | 4    | 64   | 64   | 256  | 512  |
|                             | Sau20 | L    | .    | K    | .   | .   | .   | .   | .   | .   | .   | .    | .    | Y    | G    | .   | .   | .    | .  | .   | .     | .           | 4    | 64   | 128  | 256  | 512  |
|                             | Sau53 | L    | .    | K    | .   | I   | .   | .   | .   | .   | .   | .    | .    | Y    | G    | .   | .   | .    | .  | .   | .     | .           | 4    | 64   | 128  | 256  | 512  |
|                             | Sau14 | L    | .    | K    | .   | .   | .   | .   | .   | .   | .   | H    | .    | Y    | G    | .   | .   | .    | T  | .   | .     | .           | 8    | 64   | 128  | 256  | 512  |
|                             | Sau24 | L    | .    | K    | .   | .   | .   | .   | .   | .   | .   | .    | .    | Y    | G    | .   | .   | .    | .  | .   | .     | .           | 8    | 64   | 128  | 256  | 512  |
| MIC <sub>50</sub>           |       |      |      |      |     |     |     |     |     |     |     |      |      |      |      |     |     |      |    |     |       | 4           | 64   | 128  | 256  | 512  |      |

Periods indicate no change from the most prevalent amino acid in the fluoroquinolone-susceptible consensus sequence

# indicates amino acid positions located within the QRDR

<sup>a</sup> Consensus residues reported for a total of 21 fluoroquinolone-susceptible isolates, bolded residues indicate the most prevalent amino acid (see Tables S2a and S2b)

-- indicates amino acid deletions at GyrA positions 815, 826, and 827
